# Supplementary material for: Imported Chikungunya Virus Strains, Taiwan, 2006–2014
Source: PubMed Central journal article supplement (PMC5088036; doi:10.3201/eid2211.160404), 2016-11
Supplement: 16-0404-Techapp-s1.pdf [file 16-0404-Techapp-s1.pdf]

# Imported Chikungunya Virus Strains, Taiwan, 2006–2014

## Technical Appendix

**Technical Appendix Table.** Relevant amino acid changes in structural proteins of 57 imported chikungunya virus strains, Taiwan, 2006–2014\*

| Strain                        | Protein, polypeptide position, protein position |          |          |          |          |          |          |     |          |     |          |          |          |      |      |          |      |
|-------------------------------|-------------------------------------------------|----------|----------|----------|----------|----------|----------|-----|----------|-----|----------|----------|----------|------|------|----------|------|
|                               | C                                               | C        | E3       | E2       | E2       | E2       | E2       | E2  | E2       | 6K  | E1       | E1       | E1       | E1   | E1   | E1       |      |
|                               | 81                                              | 93       | 280      | 571      | 573      | 577      | 598      | 632 | 645      | 696 | 785      | 813      | 1035     | 1093 | 1130 | 1158     | 1206 |
|                               | 81                                              | 93       | 19       | 246      | 248      | 252      | 273      | 307 | 320      | 371 | 37       | 4        | 226      | 284  | 321  | 349      | 397  |
| <b>ECSA genotype</b>          |                                                 |          |          |          |          |          |          |     |          |     |          |          |          |      |      |          |      |
| CHIK/India/0812cTw/2008       | T                                               | A        | Q        | A        | L        | <b>K</b> | N        | Q   | T        | V   | R        | V        | A        | E    | A    | N        | L    |
| CHIK/Singapore/0611aTw/2006   | T                                               | A        | Q        | A        | L        | <b>K</b> | N        | Q   | T        | V   | R        | V        | A        | E    | A    | N        | L    |
| CHIK/Singapore/0904aTw/2009   | T                                               | A        | Q        | A        | L        | Q        | N        | Q   | T        | V   | R        | V        | <b>V</b> | E    | A    | N        | L    |
| CHIK/Bangladesh/0810aTw/2008  | T                                               | A        | Q        | A        | L        | <b>K</b> | N        | Q   | <b>A</b> | V   | R        | <b>A</b> | <b>V</b> | E    | A    | <b>D</b> | L    |
| CHIK/Malaysia/0810bTw/2008    | T                                               | A        | Q        | A        | L        | Q        | N        | Q   | <b>I</b> | V   | R        | V        | <b>V</b> | E    | A    | N        | L    |
| CHIK/Malaysia/0812aTw/2008    | T                                               | A        | Q        | A        | L        | Q        | N        | Q   | T        | V   | R        | V        | <b>V</b> | E    | A    | N        | L    |
| CHIK/Malaysia/0812bTw/2008    | T                                               | A        | Q        | A        | L        | Q        | N        | Q   | T        | V   | R        | V        | <b>V</b> | E    | A    | N        | L    |
| CHIK/Malaysia/0901aTw/2009    | T                                               | A        | Q        | A        | L        | Q        | N        | Q   | T        | V   | R        | V        | <b>V</b> | E    | A    | N        | L    |
| CHIK/Malaysia/0912bTw/2009    | T                                               | A        | Q        | A        | L        | Q        | N        | Q   | T        | V   | R        | V        | <b>V</b> | E    | A    | N        | L    |
| CHIK/Thailand/0905aTw/2009    | T                                               | A        | Q        | A        | L        | Q        | N        | Q   | T        | V   | R        | V        | <b>V</b> | E    | A    | N        | L    |
| CHIK/Thailand/0911aTw/2009    | T                                               | A        | Q        | A        | L        | Q        | <b>I</b> | Q   | T        | V   | R        | V        | <b>V</b> | E    | A    | N        | L    |
| CHIK/Thailand/1306aTw/2013    | T                                               | A        | Q        | A        | L        | Q        | <b>I</b> | Q   | T        | V   | R        | V        | <b>V</b> | E    | A    | N        | L    |
| CHIK/Indonesia/0912aTw/2009   | T                                               | A        | Q        | A        | L        | Q        | N        | Q   | T        | V   | R        | V        | <b>V</b> | E    | A    | N        | L    |
| CHIK/Indonesia/1002aTw/2010   | T                                               | A        | Q        | A        | L        | Q        | N        | Q   | T        | V   | R        | V        | <b>V</b> | E    | A    | N        | L    |
| CHIK/Indonesia/1002cTw/2010   | T                                               | A        | Q        | A        | L        | Q        | N        | Q   | T        | V   | R        | V        | <b>V</b> | E    | A    | N        | L    |
| CHIK/Indonesia/1002dTw/2010   | T                                               | A        | Q        | A        | L        | Q        | N        | Q   | T        | V   | R        | V        | <b>V</b> | E    | A    | N        | L    |
| CHIK/Indonesia/1003aTw/2010   | T                                               | A        | Q        | A        | L        | Q        | N        | Q   | T        | V   | R        | V        | <b>V</b> | E    | A    | N        | L    |
| CHIK/Indonesia/1006aTw/2010   | T                                               | A        | Q        | A        | L        | Q        | N        | Q   | T        | V   | R        | V        | <b>V</b> | E    | A    | N        | L    |
| <b>Asian genotype</b>         |                                                 |          |          |          |          |          |          |     |          |     |          |          |          |      |      |          |      |
| CHIK/Indonesia/0712bTw/2007   | M                                               | V        | Q        | A        | <b>L</b> | K        | N        | Q   | T        | V   | R        | V        | A        | D    | A    | N        | P    |
| CHIK/Indonesia/0802aTw/2008   | T                                               | V        | Q        | A        | F        | K        | N        | Q   | T        | L   | R        | V        | A        | D    | A    | N        | P    |
| CHIK/Indonesia/1005bTw/2010   | T                                               | V        | Q        | A        | F        | K        | N        | Q   | T        | L   | R        | V        | A        | D    | A    | N        | P    |
| CHIK/Indonesia/0706aTw/2007   | T                                               | V        | Q        | A        | F        | K        | N        | Q   | T        | L   | R        | V        | A        | D    | A    | N        | P    |
| CHIK/Indonesia/0712aTw/2007   | T                                               | V        | Q        | A        | F        | K        | N        | Q   | T        | L   | R        | V        | A        | D    | A    | N        | P    |
| CHIK/Indonesia/0804aTw/2008   | T                                               | V        | Q        | A        | F        | K        | N        | Q   | T        | L   | R        | V        | A        | D    | A    | N        | P    |
| CHIK/Indonesia/0806aTw/2008   | T                                               | V        | Q        | A        | F        | K        | N        | Q   | T        | L   | R        | V        | A        | D    | A    | N        | P    |
| CHIK/Indonesia/0811aTw/2008   | T                                               | V        | Q        | A        | F        | K        | N        | Q   | T        | L   | R        | V        | A        | D    | A    | N        | P    |
| CHIK/Indonesia/0904bTw/2009   | T                                               | V        | Q        | A        | F        | K        | N        | Q   | T        | L   | R        | V        | A        | D    | A    | N        | P    |
| CHIK/Indonesia/0908aTw/2009   | T                                               | V        | Q        | A        | F        | K        | N        | Q   | T        | L   | R        | V        | A        | D    | A    | N        | P    |
| CHIK/Indonesia/0909aTw/2009   | T                                               | V        | Q        | A        | F        | K        | N        | Q   | T        | L   | R        | V        | A        | D    | A    | N        | P    |
| CHIK/Indonesia/1002bTw/2010   | T                                               | V        | Q        | A        | F        | K        | N        | Q   | T        | L   | R        | V        | A        | D    | A    | N        | P    |
| CHIK/Indonesia/1005aTw/2010   | T                                               | V        | Q        | A        | F        | K        | N        | Q   | T        | L   | R        | V        | A        | D    | A    | N        | P    |
| CHIK/Indonesia/1006bTw/2010   | T                                               | V        | Q        | <b>D</b> | F        | K        | N        | Q   | T        | L   | R        | V        | A        | D    | A    | N        | P    |
| CHIK/Indonesia/1310aTw/2013   | T                                               | V        | Q        | <b>D</b> | F        | K        | N        | Q   | T        | L   | R        | V        | A        | D    | A    | N        | P    |
| CHIK/Singapore/1307cTw/2013   | T                                               | <b>I</b> | Q        | A        | <b>S</b> | K        | N        | Q   | T        | L   | <b>K</b> | V        | A        | D    | A    | N        | P    |
| CHIK/Philippines/1108aTw/2011 | T                                               | V        | Q        | A        | F        | K        | N        | Q   | T        | L   | R        | V        | A        | D    | A    | N        | P    |
| CHIK/Philippines/1307bTw/2013 | T                                               | V        | <b>R</b> | A        | F        | K        | N        | Q   | T        | L   | R        | V        | A        | D    | A    | N        | L    |

| Strain                        | Protein, polypeptide position, protein position |    |          |     |          |     |     |          |     |     |     |     |      |      |          |      |          |
|-------------------------------|-------------------------------------------------|----|----------|-----|----------|-----|-----|----------|-----|-----|-----|-----|------|------|----------|------|----------|
|                               | C                                               | C  | E3       | E2  | E2       | E2  | E2  | E2       | E2  | E2  | 6K  | E1  | E1   | E1   | E1       | E1   | E1       |
|                               | 81                                              | 93 | 280      | 571 | 573      | 577 | 598 | 632      | 645 | 696 | 785 | 813 | 1035 | 1093 | 1130     | 1158 | 1206     |
|                               | 81                                              | 93 | 19       | 246 | 248      | 252 | 273 | 307      | 320 | 371 | 37  | 4   | 226  | 284  | 321      | 349  | 397      |
| CHIK/Philippines/1308aTw/2013 | T                                               | V  | <b>R</b> | A   | F        | K   | N   | Q        | T   | L   | R   | V   | A    | D    | A        | N    | <b>L</b> |
| CHIK/Philippines/1309aTw/2013 | T                                               | V  | <b>R</b> | A   | F        | K   | N   | Q        | T   | L   | R   | V   | A    | D    | A        | N    | <b>L</b> |
| CHIK/Philippines/1312aTw/2013 | <b>A</b>                                        | V  | <b>R</b> | A   | F        | K   | N   | Q        | T   | L   | R   | V   | A    | D    | A        | N    | <b>L</b> |
| CHIK/Philippines/1312bTw/2013 | T                                               | V  | <b>R</b> | A   | F        | K   | N   | Q        | T   | L   | R   | V   | A    | D    | A        | N    | <b>L</b> |
| CHIK/Philippines/1401aTw/2014 | T                                               | V  | <b>R</b> | A   | F        | K   | N   | Q        | T   | L   | R   | V   | A    | D    | A        | N    | <b>L</b> |
| CHIK/Indonesia/1011aTw/2010   | M                                               | V  | Q        | A   | S        | K   | N   | Q        | T   | V   | R   | V   | A    | D    | <b>V</b> | N    | P        |
| CHIK/Indonesia/1207aTw/2012   | M                                               | V  | Q        | A   | S        | K   | N   | <b>R</b> | T   | V   | R   | V   | A    | D    | T        | N    | P        |
| CHIK/Indonesia/1301aTw/2013   | M                                               | V  | Q        | A   | S        | K   | N   | Q        | T   | V   | R   | V   | A    | D    | <b>V</b> | N    | P        |
| CHIK/Indonesia/1302aTw/2013   | M                                               | V  | Q        | A   | <b>A</b> | K   | N   | Q        | T   | V   | R   | V   | A    | D    | <b>A</b> | N    | P        |
| CHIK/Indonesia/1303aTw/2013   | M                                               | V  | Q        | A   | S        | K   | N   | <b>R</b> | T   | V   | R   | V   | A    | D    | T        | N    | P        |
| CHIK/Indonesia/1304aTw/2013   | M                                               | V  | Q        | A   | S        | K   | N   | <b>R</b> | T   | V   | R   | V   | A    | D    | T        | N    | P        |
| CHIK/Indonesia/1307aTw/2013   | M                                               | V  | Q        | A   | S        | K   | N   | <b>R</b> | T   | V   | R   | V   | A    | D    | T        | N    | P        |
| CHIK/Indonesia/1308bTw/2013   | M                                               | V  | Q        | A   | S        | K   | N   | <b>R</b> | T   | V   | R   | V   | A    | D    | T        | N    | P        |
| CHIK/Indonesia/1308cTw/2013   | M                                               | V  | Q        | A   | S        | K   | N   | Q        | T   | V   | R   | V   | A    | D    | <b>A</b> | N    | P        |
| CHIK/Indonesia/1312cTw/2013   | M                                               | V  | Q        | A   | S        | K   | N   | <b>R</b> | T   | V   | R   | V   | A    | D    | T        | N    | P        |
| CHIK/Indonesia/1403aTw/2014   | T                                               | V  | Q        | A   | S        | K   | N   | <b>R</b> | T   | V   | R   | V   | A    | D    | T        | N    | P        |
| CHIK/Indonesia/1403bTw/2014   | M                                               | V  | Q        | A   | S        | K   | N   | <b>R</b> | T   | V   | R   | V   | A    | D    | T        | N    | P        |
| CHIK/Indonesia/1404aTw/2014   | M                                               | V  | Q        | A   | S        | K   | N   | <b>R</b> | T   | V   | R   | V   | A    | D    | T        | N    | P        |
| CHIK/Indonesia/1406aTw/2014   | M                                               | V  | Q        | A   | S        | K   | N   | <b>R</b> | T   | V   | R   | V   | A    | D    | <b>A</b> | N    | P        |
| CHIK/Indonesia/1408aTw/2014   | M                                               | V  | Q        | A   | S        | K   | N   | <b>R</b> | T   | V   | R   | V   | A    | D    | T        | N    | P        |

\*Molecular signatures are indicated in bold. C, capsid; CHIK, chikungunya; E, envelope; ECSA, East/Central/South African.

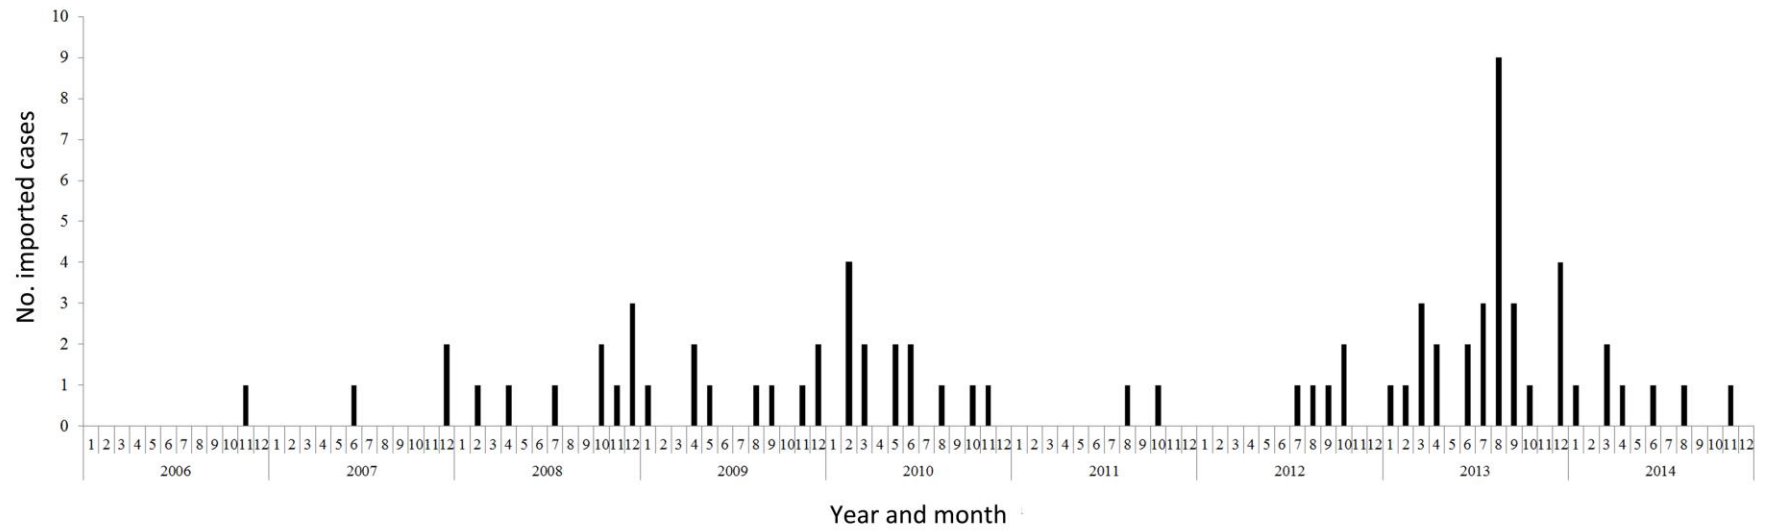

**Technical Appendix Figure.** Distribution of imported chikungunya cases, by month and year, Taiwan, 2006–2014.
